# Supplementary material
Source: HighWire-hosted journal article supplement (https://jnm.snmjournals.org/highwire/filestream/99316/field_highwire_adjunct_files/0/245456_Supplemental_Data.pdf)
Supplement: 245456_Supplemental_Data.pdf [file 245456_Supplemental_Data.pdf]

**Supplemental Table 1: Patient characteristics.**

|                                                         | <b>All patients (n=55)</b> |
|---------------------------------------------------------|----------------------------|
| <b>Age (years)</b>                                      | <b>(n=55)</b>              |
| Median (range)                                          | 70 (56–86)                 |
| <b>Prostate-specific antigen (ng/mL)</b>                | <b>(n=55)</b>              |
| Median (range)                                          | 1.5 (0.1 – 3.0)            |
| <b>Prostate-specific antigen doubling time (months)</b> | <b>(n=44)</b>              |
| ≤6                                                      | 27 (61)                    |
| >6                                                      | 17 (39)                    |
| <b>Gleason score</b>                                    | <b>(n=47)</b>              |
| < 8                                                     | 19 (40)                    |
| ≥ 8                                                     | 28 (60)                    |
| <b>Initial treatment</b>                                | <b>(n=55)</b>              |
| Prostatectomy                                           | 44 (80)                    |
| Lymph node resection                                    | 32 (58)                    |
| Radiation therapy                                       | 11 (20)                    |

Data are number of patients (%) unless otherwise indicated.
